# Supplementary material for: A novel metal–insulator phase transition observed in (EDO-TTF)2PF6
Source: Royal Society of Chemistry journal article supplement (doi:10.1039/b206293c), 2002-01-01
Supplement: b206293c.pdf [file b206293c.pdf]

A novel metal-insulator phase transition observed in (EDO-TTF)<sub>2</sub>PF<sub>6</sub>

# The data of the Raman spectra for (EDO-TTF)<sub>2</sub>PF<sub>6</sub>, (EDO-TTF)<sub>2</sub>AsF<sub>6</sub>

The peaks derived from the C=C stretching of ethylenedioxy ring ( $\nu_1$ ), 1,3-dithiole ring without ethylenedioxy group ( $\nu_2$ ), and central C=C bond ( $\nu_3$ ) are shown in Table for each donor molecule. Assuming the linear relationship between the charge on a donor molecule and the Raman shifts, the charge distribution in the donor molecules in the LT phase is estimated. The details of the optical spectra of (EDO-TTF)<sub>2</sub>PF<sub>6</sub> will be published separately: O. Drozdova, K. Yakushi, A. Ota, H. Yamochi, G. Saito, submitted to Synth. Met.

Table

|                                                    |   | $\nu_1 / \text{cm}^{-1}$ | $\nu_2 / \text{cm}^{-1}$ | $\nu_3 / \text{cm}^{-1}$ | Charge             |
|----------------------------------------------------|---|--------------------------|--------------------------|--------------------------|--------------------|
| Neutral EDO-TTF                                    |   | 1650                     | 1538                     | 1510                     | 0                  |
| (EDO-TTF) <sub>2</sub> PF <sub>6</sub> at RT       |   | Very weak                | 1515                     | 1472                     | +0.5               |
| (EDO-TTF) <sub>2</sub> AsF <sub>6</sub> at RT      |   | Very weak                | 1515                     | 1469                     | +0.5               |
| (EDO-TTF)IBr <sub>2</sub>                          |   | 1560                     | 1480                     | 1408                     | +1                 |
| (EDO-TTF) <sub>2</sub> PF <sub>6</sub><br>at 4.2K  | B | 1649                     | 1539                     | 1499                     | < +0.1 (estimated) |
|                                                    | F | 1572                     | 1484                     | 1412                     | > +0.9 (estimated) |
| (EDO-TTF) <sub>2</sub> AsF <sub>6</sub><br>at 4.2K | B | 1647                     | 1538                     | 1497                     | < +0.1 (estimated) |
|                                                    | F | 1570                     | 1483                     | 1412                     | > +0.9 (estimated) |

# A novel metal-insulator phase transition observed in (EDO-TTF)<sub>2</sub>PF<sub>6</sub>

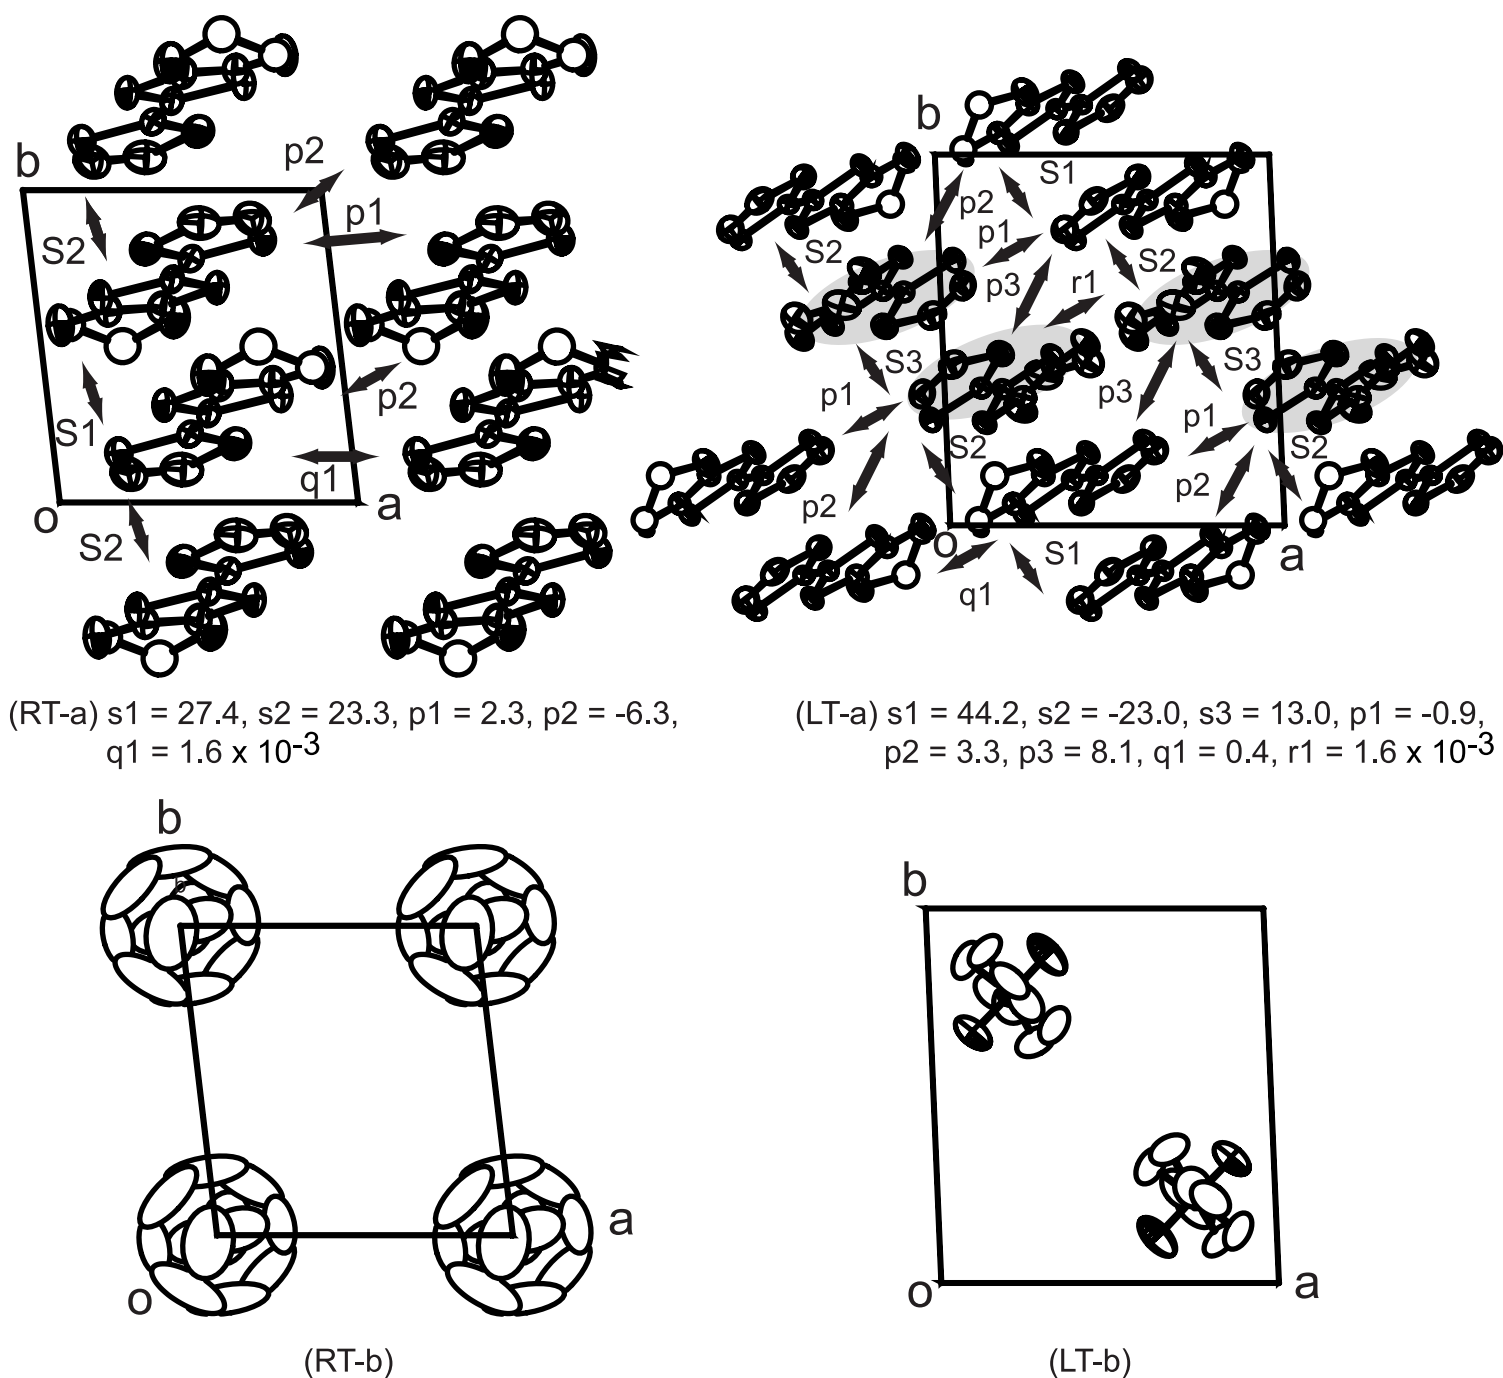

Supporting Information: The crystal structures of (EDO-TTF)<sub>2</sub>PF<sub>6</sub> at room temperature (RT) and at 260 K. (RT-a) and (LT-a) depict the c-axis projection of donor layers in RT and low temperature (LT) phases along with the calculated overlap integrals, respectively. For the donor molecules in RT phase and the flat shaped ones in LT phase, both of the two orientations of the terminal ethylene group obtained by the structural analysis afforded the same intermolecular overlap integrals and hence the band structure. In (LT-a), the bent donor molecules, which are assigned to be less charged than the flat ones, are shaded. (RT-b) and (LT-b) depict the anion layers in RT and LT phases, respectively. The a- and b-axes for the LT phase correspond to those of (a+b) and (a-b) in RT phase, respectively. In all cases, the atoms, of which site occupancy factors are less than unity are depicted by open ellipsoids.
