# Supplementary material for: A novel metal–insulator phase transition observed in (EDO-TTF)2PF6
Source: Royal Society of Chemistry journal article supplement (doi:10.1039/b206293c), 2002-01-01
Supplement: b206293c1.pdf [file b206293c1.pdf]

The authors would like to draw the readers' attention to the following point:

The indications of the intermolecular overlap integrals in the figure (RT-a) in ESI contained wrong description.

The figure (RT-a) in ESI shows wrong indication of intermolecular overlap integrals and the caption included the wrong values of the numerical data.

The figure and the caption should be replaced by the following one.

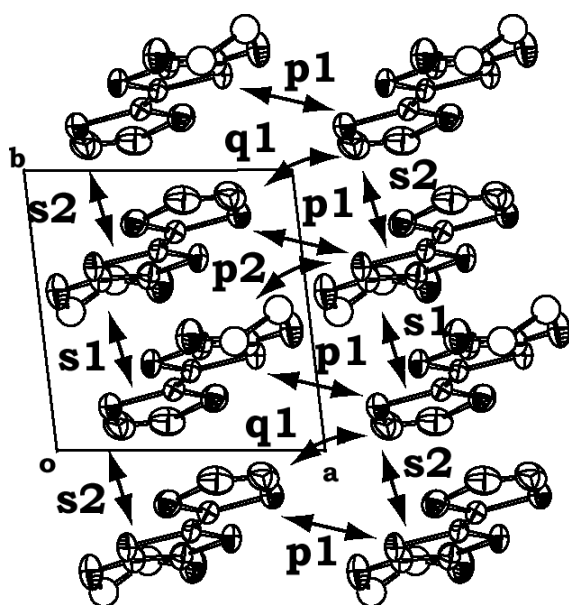

(RT-a)  $s1 = 27.4$ ,  $s2 = 27.3$ ,  $p1 = -6.3$ ,  $p2 = 2.3$ ,  $q1 = 1.6 \times 10^{-3}$
